# Supplementary material for: An Insight into the Role of Trissolcus mitsukurii as Biological Control Agent of Halyomorpha halys in Northeastern Italy
Source: MDPI journal article supplement (doi:10.3390/insects11050306), 2020-05-14
Supplement: s1 [file s1]

**Table S1.** Overview on fates and parasitism of *Halyomorpha halys* egg masses collected in the study site of Auer (Ora), Trentino-Alto Adige (Site 3) in September and October 2018.

| Sampling Period<br>(2018) | <i>n</i> of <i>H.<br/>halys</i> Eggs<br>Collected | Mean <i>n</i> of<br>Eggs/Egg<br>Mass | <i>n</i> Eggs<br>Hatched | <i>n</i> eggs<br>Predated,<br>Deformed or<br>Discolored <sup>a</sup> | <i>n</i> Eggs<br>Parasitized | Parasitoid<br>Impact (%) |
|---------------------------|---------------------------------------------------|--------------------------------------|--------------------------|----------------------------------------------------------------------|------------------------------|--------------------------|
| 10–16 September           | 664                                               | 24.6                                 | 515                      | 96                                                                   | 53                           | 8.0                      |
| 17–23 September           | 25                                                | 25.0                                 | 0                        | 21                                                                   | 4                            | 16.0                     |
| 24–30 September           | 407                                               | 22.6                                 | 188                      | 93                                                                   | 126                          | 31.0                     |
| 1–7 October               | 210                                               | 26.3                                 | 131                      | 57                                                                   | 22                           | 10.5                     |
| 8–14 October              | 171                                               | 24.4                                 | 75                       | 47                                                                   | 49                           | 28.7                     |
| 22–28 October             | 43                                                | 21.5                                 | 30                       | 13                                                                   | 0                            | 0                        |
| Total                     | 1520                                              | 24.1                                 | 939                      | 327                                                                  | 254                          | 16.7                     |

<sup>a</sup> Eggs with signs of sucking or chewing predators, deformed or discolored eggs, where the cause of mortality could not be assigned.
